# Supplementary material for: Nanotechnology in Lubricants: A Systematic Review of the Use of Nanoparticles to Reduce the Friction Coefficient
Source: MDPI journal article supplement (doi:10.3390/lubricants12050166), 2024-05-09

# Identification of new studies via databases and registers

# Identification of new studies via other methods

Identification

Screening

Included

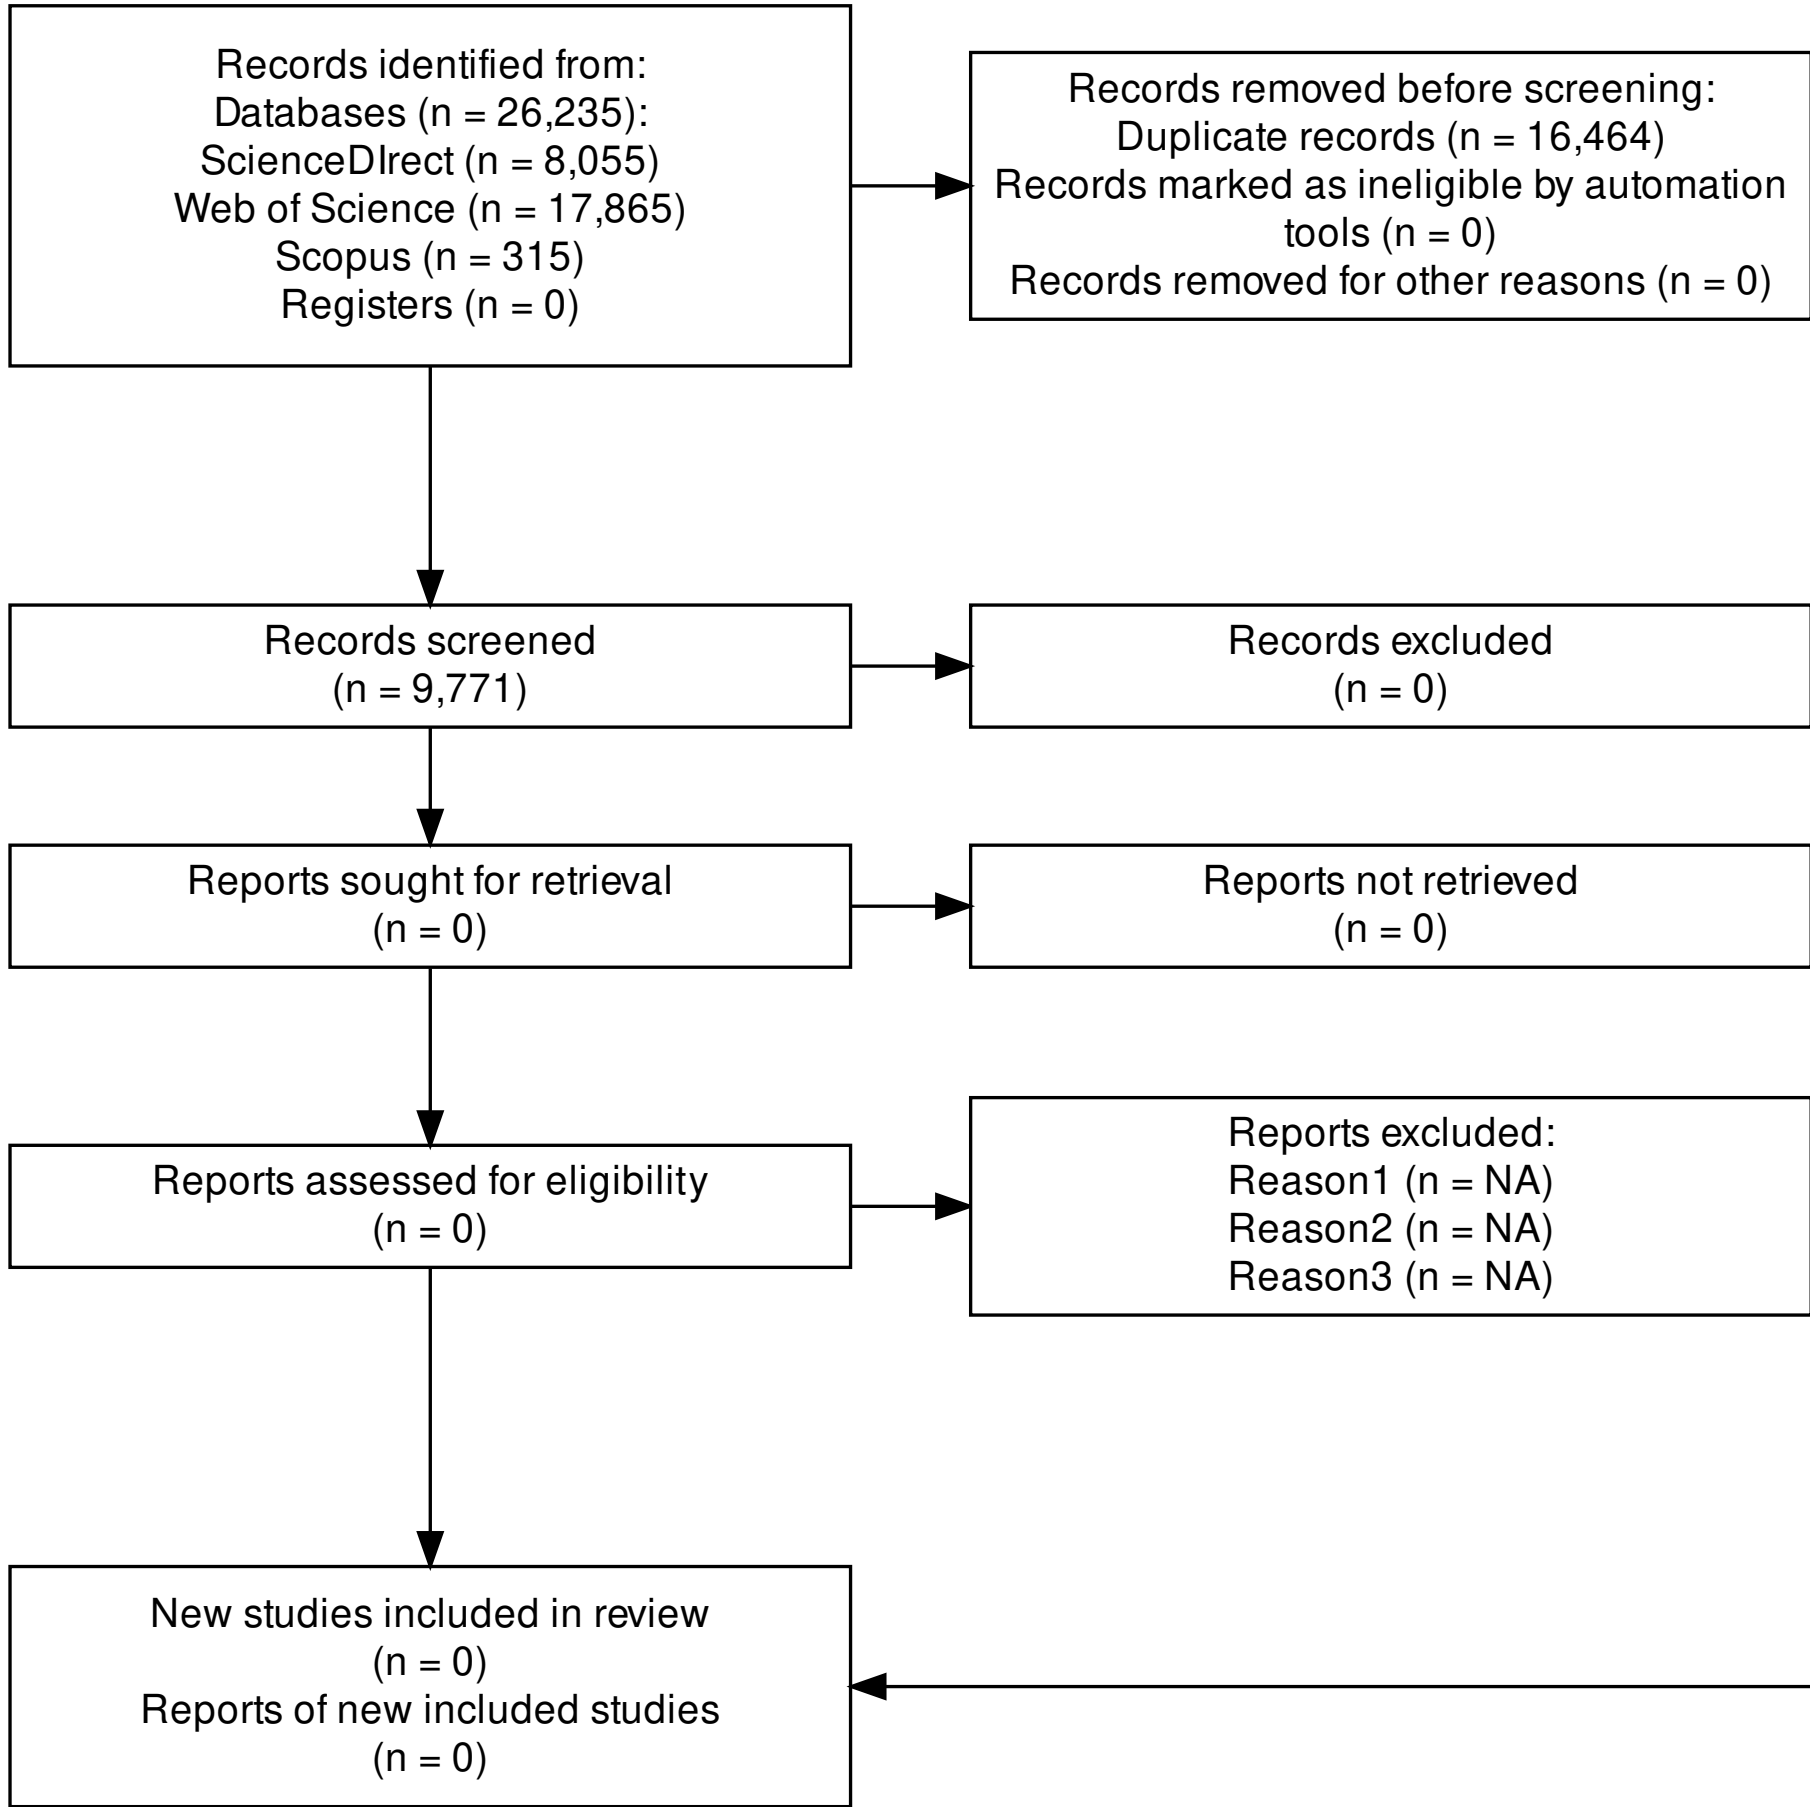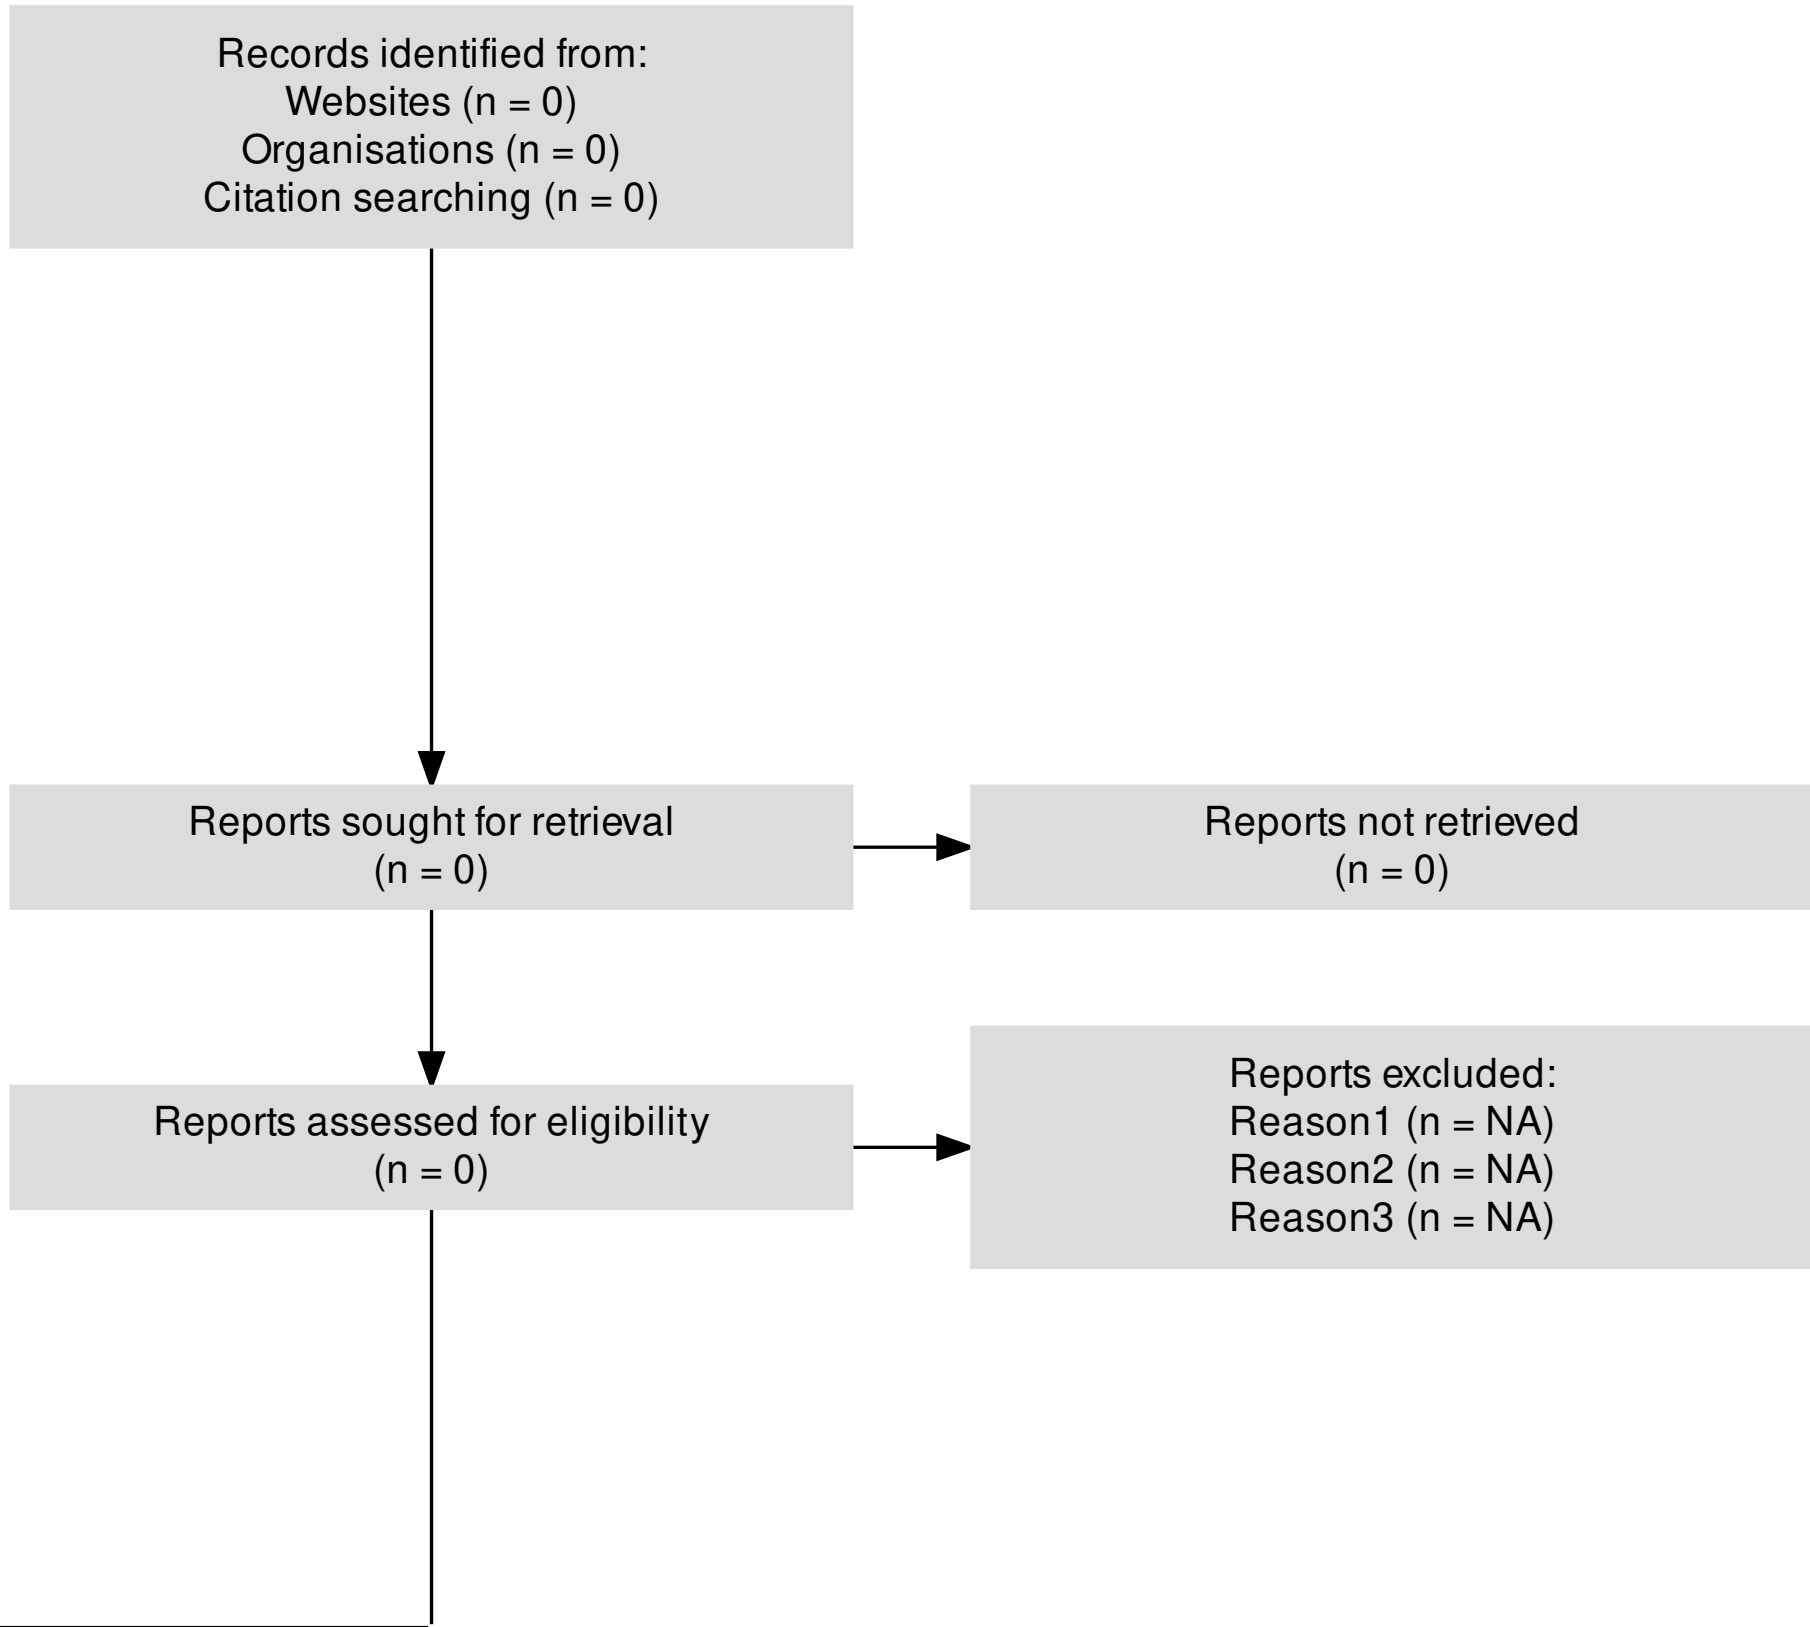

Supplement: s1 [file s1]
